1 *Running head:* Demographic consequences of invasion by a native competitor

2

3 **Demographic consequences of invasion by a native, controphic competitor to an insular**  
4 **bird population**

5 Kate M. Johnson<sup>1,2</sup>, R.R. Germain<sup>1,3</sup>, C.E. Tarwater<sup>1,4</sup>, and Peter Arcese<sup>1\*</sup>

6

7 <sup>1</sup>*Department of Forest and Conservation Sciences, University of British Columbia, 2424 Main*  
8 *Mall, Vancouver, BC, Canada V6T 1Z4*

9 <sup>2</sup>*Faculty of Pharmaceutical Sciences, University of British Columbia, 2405 Wesbrook Mall,*  
10 *Vancouver, BC, Canada, V6T 1Z3*

11 <sup>3</sup>*Institute of Biological and Environmental Sciences, School of Biological Sciences, Zoology*  
12 *Building, University of Aberdeen, Tillydrone Avenue, Aberdeen AB24 2TZ, UK*

13 <sup>4</sup>*Department of Zoology and Physiology, University of Wyoming, Laramie, WY 82071*

14 \*Corresponding author: [peter.arcese@ubc.ca](mailto:peter.arcese@ubc.ca), Phone: 604-822-1886

15 Word count: 4,331 (excluding abstract, acknowledgement, references, and figure legends)

16 *Abstract.* Species invasions and range shifts can lead to novel competitive interactions between  
17 historically resident and colonizing species, but the demographic consequences of such  
18 interactions remain controversial. We present results from field experiments and 45 yrs of  
19 demographic monitoring to test the hypothesis that the colonization of Mandarte Is., BC, Canada,  
20 by fox sparrows (*Passerella iliaca*) caused the long-term decline of the song sparrow (*Melospiza*  
21 *melodia*) population resident there. Several lines of evidence indicate that competition with fox  
22 sparrows for winter food reduced over-winter survival in juvenile song sparrows, enforcing  
23 population decline despite an increase in annual reproductive rate in song sparrows over the  
24 same period. In contrast, we found no evidence of interspecific competition for resources during  
25 the breeding season. Our results indicate that in the absence of a sufficient ecological or  
26 evolutionary shift in niche dimension, range expansions by dominant competitors have the  
27 potential to cause the extirpation of historically resident species when competitive interactions  
28 between them are strong and resources not equitably partitioned.

29 **Word count:** 165

30 **Keywords:** interspecific competition; competitive exclusion; invasive species; range shifts;

31 *Melospiza melodia*; *Passerella iliaca*

32

33 **INTRODUCTION**

34 Exotic species are well-known to affect community composition via competitive, predatory and  
35 pathogenic interactions, especially on islands (Reaser et al. 2007; Dhondt 2012; Doherty et al.  
36 2016). However, despite many native species undergoing range shifts linked to climate and land  
37 use change (e.g., Parmesan 2006; Early and Sax 2014; Krosby et al. 2015; Elmhagen et al. 2015),  
38 relatively little is known about the demographic impacts of these colonists on historically extant  
39 species (Davis and Shaw 2001; Loarie et al. 2008; Sorte et al. 2010; Rodewald and Arcese  
40 2016). Theory suggests that the response of native species to controphic colonists will depend on  
41 their overlap in resource use, the demographic effects of resource limitation, the time-frame over  
42 which competitive exclusion might occur relative to the rate at which native species can adapt  
43 via ecological or evolutionary shifts in niche dimension, and the spatial scale examined (Shea  
44 and Chesson 2002; Davis 2003; Gurevitch and Padilla 2004; Reaser et al. 2007; Sax et al. 2007;  
45 Bennett et al. 2012; Dhondt 2012; Stuart et al. 2014). Although examples of competitive  
46 exclusion by colonist species remain rare, they are thought to be most likely to occur where  
47 environmental heterogeneity is low, such as small islands or isolated water bodies (e.g., Chesson  
48 2000; Davies et al. 2005; Melbourne et al. 2007; MacDougall et al. 2009). Given the potential for  
49 novel competitive interactions to shape species demography and community composition  
50 (Simberloff 2005; Reaser et al. 2007), we used a 45 yr study of an island song sparrow  
51 (*Melospiza melodia*) population to ask how the colonisation and expansion of a colonist,  
52 controphic competitor, the fox sparrow (*Paserella illiaca*) has affected its demography.

53 Although described as migratory throughout its range in North America (Weckstein et al.  
54 2002), fox sparrows established resident populations in the San Juan and Gulf Islands of western  
55 North America in the latter half of the 20<sup>th</sup> century, where they now survive and reproduce at

56 rates consistent with rapid population growth (Vistry et al. 2017). Because song and fox sparrows  
57 are territorial, very similar in life history, but differ in size, we used field experiments and  
58 demographic analyses to test for evidence of interspecific competition between song sparrows  
59 and this colonist following Dhondt (2012) and Jankowski et al. (2010).

60 Specifically, we first used a life-table response experiment and 45 years of demographic  
61 data to identify vital rates contributing most to song sparrow population growth over time, and to  
62 test if those rates varied with fox sparrow abundance. We next tested for interspecific  
63 competition for breeding habitat by conducting simulated territorial intrusions to quantify  
64 interference competition. Because exploitative competition might reduce breeding habitat quality  
65 even in the absence of interspecific territoriality, we also tested for long-term declines in site  
66 quality following Germain and Arcese (2014). Last, we tested for evidence of interspecific  
67 competition for access to winter food by measuring diet overlap and inter-specific dominance.

68

69

## METHODS

70

### *Study system*

71 Mandarte Is. is a c. 6 ha islet in southwestern BC, Canada, where a resident, individually-banded  
72 song sparrow population was monitored from 1960–63 and 1975–2016 (Tompa 1963; Germain  
73 et al. 2015). Song sparrows are a c. 24 g passerine that occur over much of North America at  
74 densities of ~1–9 pairs/ha (Arcese et al. 2002). On Mandarte Is. song sparrows lay 2–5 eggs in 1-  
75 7 open-cup nests annually (Arcese et al. 1992) and defend 200–5000 m<sup>2</sup> territories year-round  
76 (Arcese 1989). From April – July 1960–63, 1975-79, and 1981-2016, the territorial status and  
77 breeding activity of all song sparrows was monitored at least weekly to locate all nests annually.  
78 All nestlings were colour-banded, followed to independence from parental care (~24 days post-

79 hatch) and their recruitment or disappearance from the population was recorded, which provided  
80 precise estimates of annual population size, age structure, and reproductive and survival rates  
81 (annual re-sighting probability >99%; Wilson et al. 2007). About one immigrant song sparrow  
82 settles on Mandarte Is. annually, but because that rate is low and about constant it is not  
83 considered here.

84 Fox sparrows are ~19% larger than song sparrows in mass and linear traits and, like song  
85 sparrows are territorial, multi-brooded, open-cup nesters that feed mainly on seeds (winter) and  
86 insects (breeding; Weckstein et al. 2002, Vistry et al. 2017). Fox sparrows are native to BC, but  
87 were absent from Mandarte Is. prior to 1975 (Tompa 1963; Drent et al. 1964), when they first  
88 bred there (J.N.M. Smith, pers. com.). Fox sparrows were counted systematically in 13 yrs from  
89 1960-2016 by spot-mapping singing males, their mates and nest locations, and by mapping their  
90 territories in detail in 2010 and 2013–16 when up to 70% of adults were individually identified.

91 Rate of annual change in the number of female sparrows on the island in late April was  
92 estimated using a generalized linear model with year as a fixed effect (fox sparrow: Poisson  
93 distribution, log link; song sparrow, Gaussian distribution). We tested for temporal  
94 autocorrelation in the time series (finding none) and employed R 3.1.3 (R Core Team 2015) for  
95 all statistical analyses.

#### 96 *Demographic rates*

97 We identified the demographic vital rate contributing most to song sparrow population growth  
98 using a stage-structured life table response experiment (LTRE) to estimate the contribution of  
99 each vital rate to growth from 1975–2014. We used juvenile and adult age-classes for both sexes  
100 because adults differ modestly in survival and reproductive rate after reaching adulthood. Local  
101 juvenile survival was estimated as the proportion of offspring surviving from independence (day

102 24 post-hatch) to April 30 the next year. Adult survival was the proportion of individuals alive  
103 on April 30 in year  $t$  that survived to year  $t + 1$ . Reproductive rate was the mean number of  
104 independent young produced per female annually, excluding birds used in experiments (1979,  $n$   
105 = 70; 1985,  $n = 87$ ; 1988,  $n = 114$ ; Arcese and Smith 1988; Smith et al. 2006). Juvenile survival  
106 was unknown in 1979 and 1980, reproductive rate unknown in 1980, and adult survival unknown  
107 in 1975.

108 The LTRE included a treatment matrix parameterized with juvenile and adult survival  
109 and adult reproductive rate in each of 37 yrs. Vital rates were arranged in 2 x 2 treatment  
110 matrices wherein the 1<sup>st</sup> and 2<sup>nd</sup> columns included juvenile and adult vital rates, respectively, and  
111 the first and second rows specified reproduction and survival rates, respectively. Because  
112 juveniles do not breed, the 1<sup>st</sup> row of column one always equalled zero. Treatment matrices were  
113 compared to a 2 x 2 reference matrix of mean vital rate over all years to determine the  
114 contribution ( $c_{ij}$ ) of each vital rate to annual population growth (*cf* Caswell 1996) such that:

115

$$116 \quad c_{ij} = (a_{ij \text{ ref}} - a_{ij \text{ trt}}) * s_{ij \text{ ref}} \quad \text{eqn. 1}$$

117

118 where  $a_{ij}$  is the  $(i,j)$  element of  $a$ , the reference (*ref*) or treatment (*trt*) matrix, and  $s_{ij}$  is the  
119 sensitivity of the reference matrix, indicating the impact of an absolute change in a vital rate on  
120 population growth (de Kroon et al. 1986; Caswell 1996). Analyses were implemented in the  
121 *popbio* package (Stubben and Milligan 2007) and trends in vital rate contribution estimated by  
122 linear model (Gaussian). Because the LTRE indicated that juvenile survival was a key vital rate,  
123 we tested for an effect ( $\alpha \leq 0.05$ ) of fox sparrow abundance on juvenile song sparrow survival  
124 using a linear model (Gaussian distribution), with fox and song sparrow numbers as predictors.

125 Song sparrow numbers was included because it was shown previously to predict juvenile  
126 survival in that species (Arcese et al. 1992). Estimates of fox sparrow population size and song  
127 sparrow juvenile survival were available for 11 years from 1960 to 2016.

128

129 *Competition for winter food*

130 Dhondt (2012) identified space, nesting habitat and food as common limiting factors in bird  
131 communities. We tested for interspecific competition for winter food between fox and song  
132 sparrows using a seed preference experiment to estimate diet overlap, and two arena experiments  
133 to assess behavioral dominance in contests over food. We assessed the breadth of winter food  
134 available by characterising the type and abundance of seeds in soil, given that both species feed  
135 mainly on seeds in winter (Tompá 1963; Willson 1971; Arcese et al. 1992; Weckstein et al.  
136 2002). To do so we excavated 250 ml of soil (10 x 15cm, 2cm deep) at 15 sites across the island  
137 in December 2013, extracting all seeds by sieve to estimate abundance by identity. Seeds  
138 recovered in soil included 64% blackberry (*Rubus armeniacus*), 17% Oregon grape (*Mahonia*  
139 *aquifolium*), 8% Nootka rose (*Rosa nootkensis*), 8% red elderberry (*Sambucus racemosa*), and  
140 3% other (bitter cherry, *Prunus emarginata*; choke cherry, *P. virginiana*; snowberry,  
141 *Symphoricarpos albus*; grape, *Vitis sp.*) by volume.

142 We estimated fox and song sparrow preference for seeds in March 2015 by cleaning, then  
143 freezing blackberry, Nootka rose, elderberry, and snowberry seeds collected from fruits in  
144 summer 2014. We chose the seed types that were most abundant in soil samples with the  
145 exception of Oregon grape and cherry, which are ~1.5x larger than all other seed types and are  
146 likely inedible to song and fox sparrows. Seeds were arranged by species in one of four 98cm<sup>3</sup>  
147 circular depressions ('cups') in 60 x 12 x 3 cm plywood feeders, and rotated among cups in each

148 trial to avoid location effects. Feeders were placed on the ground at 6 locations on the island used  
149 regularly by foraging fox and song sparrows. In each trial we recorded by video the fraction of  
150 time a visiting fox or song sparrow fed on each seed type (N=14 trials, including 50 visits by 6  
151 different song sparrows and 9 different fox sparrows). A ‘visit’ comprised the time elapsed from  
152 when a focal bird picked up its first seed, to the time the focal bird’s lower mandible stopped  
153 moving after last seed was eaten, prior to leaving. Seed preference was estimated by recording  
154 the total time from when a focal bird picked up a first seed in cup  $x$ , to the point its lower  
155 mandible stopped moving before selecting a seed from a different cup or leaving. The proportion  
156 of total time spent feeding on each seed type during a visit was then used as the dependent  
157 variable in a generalized linear mixed model (GLMM, quasibinomial distribution, logit link).  
158 Each visit was numbered and included in the model as a random effect, as was fox or song  
159 sparrow identity. We used the `glht` function in the *multcomp* package (Hothorn et al. 2008) to  
160 assess statistical significance of all pairwise comparisons of fox or song sparrow with each seed  
161 species using Tukey contrasts for unequal groups (Tukey 1949; Kramer 1956).

162 We conducted arena experiments in October 2013 to assess interspecific dominance at  
163 winter food sources by piling 250ml of commercial bird seed at 5 sheltered locations across the  
164 island and using video cameras to record interactions. We recorded 19 fox and 19 song sparrows  
165 in 68 aggressive interactions. The winning individual stayed in the arena (datum = 1); the loser  
166 was chased (datum = 0; Arcese and Smith 1985). We tested the null expectation of equality  
167 among species using two GLMMs (binomial distributions, logit links), each including fox and  
168 song sparrow identity as random effects. In the first model, we estimated the displacement rate  
169 using maximum likelihood; in the second model, we tested the hypothesis of displacement rate  
170 equal to 0.5 for both species. Finding a significant effect of ‘species’ on displacement is



171 consistent with a hypothesis of interspecific dominance. We replicated the arena experiment in  
172 March 2015 using 20 feeders (15 x 20cm plastic tray on ~20cm stake; 250ml of commercial  
173 birdseed), distributed in sheltered sites across the island. We monitored, scored and analysed 31  
174 interactions between 20 song and 16 fox sparrows.

175

176

### *Competition for space*

177 To test whether fox and song sparrows compete for breeding space, we first calculated the spatial  
178 overlap of song and fox sparrow territories in 2010, 2013, 2014 using ArcMap (ESRI 2011). We  
179 also conducted playback experiments prior to breeding in April 2014 to quantify the response of  
180 song sparrows to fox sparrow, song sparrow, and Swainson's thrush (*Catharus ustulatus*) (a  
181 control species) following Jankowski et al. (2010). Playback experiments involved placing a  
182 taxidermic mount on an artificial perch at the center of 27 song sparrow territories, and playing  
183 species-appropriate song from a speaker placed below the mount. In each 12 min trial we  
184 recorded the closest approach of the territorial male and female song sparrow to the mounts,  
185 during: 2 min of pre-trial observation, 5 min of playback, and 5 min follow-up observation. All  
186 mounts were presented in random order and prepared in a neutral, perched position. Swainson's  
187 thrushes are similar to fox sparrows in size but do not breed on Mandarte Is. Trials were  
188 conducted throughout the day but separated by  $\geq 1$  hour on focal and neighboring territories.  
189 Closest approach to the mount was used as a dependent variable to indicate aggression (*cf*  
190 Jankowski et al. 2010) and compared among mounts using a GLMM (negative binomial  
191 distribution, log link), and including the identity of focal male song sparrows as a random effect.  
192 Time of day (categorical effect: morning, <10am, n = 22; midday, 10–1pm, n = 27; afternoon, 1–  
193 4pm, n = 6; evening, >4pm, n = 22), whether or not the focal male was singing prior to playback

194 (1/0 fixed effect), and whether one or more neighbor males sang in response to playbacks were  
195 also recorded and included as covariates (1/0 fixed effect).

196

197 *Competition for nesting habitat*

198 We followed Germain and Arcese (2014) to estimate site quality as the mean number of  
199 independent song sparrow young produced annually in each of 146 20 x 20 m grid cells  
200 distributed continuously over the island. Doing so allowed us to test the prediction that site  
201 quality for song sparrows declined as fox sparrow abundance increased over time, as expected  
202 given competition by song and fox sparrows for breeding resources. Specifically, we regressed  
203 site quality on year using a linear mixed model (year of study included as a fixed effect, grid cell  
204 identity as a random effect). We also tested for a decline in the mean number of independent  
205 young produced by female song sparrows over the study using a GLMM (negative binomial  
206 distribution, log link) with year as a fixed effect and female identity as a random effect to  
207 account for repeat observations across years.

208

209 **RESULTS**

210 *Population size and demography*

211 Female song sparrow population size varied widely over 45 years (range = 4–71, mean = 35.0 ±  
212 17.1 SD), but declined on average ( $\beta = -0.60 \pm 0.14$  SE,  $t(43) = -4.19$ ,  $p < 0.001$ ,  $R^2 = 0.29$ ;  
213 figure 1). In contrast, fox sparrow abundance increased after 1975 (range = 1–30 females,  $\beta =$   
214  $0.06 \pm 0.01$  SE,  $z(11) = 9.13$ ,  $p < 0.001$ ; figure 1).

215 Juvenile song sparrow survival also varied widely over the 37 yrs it was recorded from  
216 1960 to 2016 (range = 0.04–0.88, mean =  $0.37 \pm 0.18$  SD,  $n_{\text{yrs}} = 37$ ; figure 2), as did adult annual

217 survival (range = 0.07–0.88, mean =  $0.59 \pm 0.17$  SD,  $n_{\text{yrs}} = 38$ ), and annual reproductive rate  
218 (range = 1.10–6.90, mean =  $3.25 \pm 1.32$  SD,  $n_{\text{yrs}} = 38$ ). However, despite wide variation in song  
219 sparrow vital rates over time, when contribution (as determined from the LTRE) was regressed  
220 on year, juvenile survival was the only vital rate to increase in influence over time ( $\beta = -0.01 \pm$   
221  $0.004$  SE,  $t(35) = -3.37$ ,  $R^2 = 0.25$ ,  $p = 0.002$ ; figure 3a). Variation in annual reproductive rate  
222 had no detectable effect on long-term change in song sparrow population size ( $t(35) = -1.29$ ,  $p =$   
223  $0.21$ ,  $R^2 = 0.05$ ; figure 3b). Similarly, the contributions of annual adult survival to change in  
224 population size were smaller and unrelated to long-term decline in song sparrow abundance  
225 ( $t(35) = 1.29$ ,  $p = 0.20$ ,  $R^2 = 0.05$ ; figure 3c).

226 The fraction of juvenile song sparrows surviving overwinter also declined as fox sparrow  
227 abundance increased (figure 4), amounting to a 40% decline in the expected value of survival  
228 from 1960 to 2015 ( $0.39 \pm 0.06$  SE and  $0.23 \pm 0.07$  SE, respectively). Juvenile song sparrow  
229 survival was also inversely related to fox sparrow population size ( $\beta = -0.009$ ,  $\pm 0.004$  SE,  $t(8) =$   
230  $-2.46$ ,  $p = 0.04$ ,  $R^2 = 0.44$ ), but unrelated to song sparrow population size ( $t(8) = -0.63$ ,  $p = 0.55$ ).

231

232

#### *Competition for winter food*

233 Fox and song sparrows exhibited a strong preference for elderberry (mean proportion of time  
234 spent feeding  $0.34 \pm 0.05$  SE and  $0.34 \pm 0.12$  SE, respectively), and against blackberry (mean  
235  $0.05 \pm 0.02$  SE and  $<0.01 \pm 0.003$  SE, respectively). But we found no differences in the time  
236 spent feeding by each species on blackberry, Nootka rose, red elderberry or snowberry seeds  
237 (blackberry:  $z(59) = -0.81$ ,  $p = 1.0$ , elderberry:  $z(59) = -0.19$ ,  $p = 1.0$ , rose:  $z(59) = -0.37$ ,  $p =$   
238  $1.0$ , snowberry:  $z(59) = -0.18$ ,  $p = 1.0$ ), implying complete overlap in preference for these seed  
239 species (figure 5).

240 Our observations of song and fox sparrows at experimental arenas baited with  
241 commercial bird seed revealed that song sparrows were displaced by fox sparrows in 91% of 68  
242 contests ( $X^2 = 25.6$ ,  $df = 1$ ,  $p < 0.001$ ) in October. In a replicate experiment in early March fox  
243 sparrows displaced song sparrows in 100% of 31 interactions, obviating further analysis.

244

#### 245 *Competition for space and nest sites*

246 We observed no evidence of competition for space or nest sites during the breeding period. Fox  
247 and song sparrow breeding territories overlapped 100% in 2010, 2013 and 2014, and no  
248 aggressive interactions between them were observed despite regularly perching or singing within  
249 1 m of each other. Territorial song sparrows approached conspecific mounts in simulated  
250 intrusions much more closely than fox sparrow or Swainson's thrush mounts ( $t(41) = -7.83$ ,  $p <$   
251  $0.001$  and  $t(41) = -8.28$ ,  $p < 0.001$ ; respectively). Song sparrows also responded similarly to fox  
252 sparrows and Swainson's thrush mounts ( $t(41) = -0.82$ ,  $p = 0.42$ ; figure 6), indicating that song  
253 sparrows did not respond to territorial intrusions by fox sparrows as expected if these species  
254 compete for breeding space.

255 We observed no evidence of a long-term decline in nest site quality (expected number of  
256 song sparrow young produced per nest;  $t(2671) = -1.29$ ,  $p = 0.20$ ) evaluated in 147 grid squares  
257 distributed continuously over the island and monitored annually over the study (see Methods).  
258 However, we observed a statistically significant increase in the mean annual reproductive  
259 success of female song sparrows from 1975 to 2014 ( $\beta = 0.014$ ,  $SE = 0.002$ ,  $t(643) = 6.63$ ,  $p <$   
260  $0.001$ ). These results are opposite to the hypothesis that fox and song sparrows compete during  
261 the breeding period.

262

263

## DISCUSSION

264 We tested whether the colonization of Mandarte Is. by fox sparrows in 1975 led to the decline of  
265 the song sparrow population resident there (figure 1). Song sparrows have, on average, declined  
266 over the past 46 years whilst fox sparrows increased from 0 to 30 breeding pairs. Demographic  
267 analyses indicate that juvenile survival was the most influential of three vital rates affecting  
268 population growth in song sparrows and that it declined as fox sparrows increased (figure 4). In  
269 comparison, adult survival and reproductive rate had no detectable effect on the long-term  
270 decline in song sparrow abundance (figure 3). These findings mirror analyses conducted at much  
271 larger scales which indicate a long-term, regional decline in song sparrow abundance (Jewell and  
272 Arcese 2008), but increases in fox sparrow abundance, particularly in winter (Vistry et al. 2017).  
273 Because these results are consistent with the hypothesis that interspecific competition may be  
274 contributing to song sparrow declines on Mandarte Is. and regionally, we conducted additional  
275 tests to discover potential mechanisms, focusing on competition during breeding and overwinter  
276 periods.

277 Contrary to the idea that fox and song sparrows compete for breeding space, we observed  
278 complete overlap in song and fox sparrow territories. Moreover, territorial song sparrows largely  
279 ignored simulated intrusions by fox sparrows (and the control), despite responding strongly to  
280 simulated intrusions by song sparrows (figure 6). These results are opposite to expectation if fox  
281 and song sparrows compete by interference for breeding space (Jankowski et al. 2010; Dhondt  
282 2012).

283 We also found no evidence of exploitative competition between fox and song sparrows in  
284 the breeding period. First, annual reproductive rate in female song sparrows increased as song  
285 sparrow population size declined and fox sparrows increased (figure 3c), opposite to

286 expectations under exploitative competition (Dhondt 2012), but consistent with earlier reports of  
287 density-dependent reproductive success in song sparrows (Arcese and Smith 1988; Arcese et al.  
288 1992). Second, we detected no change in habitat quality for song sparrows (*cf* Germain and  
289 Arcese 2014; Crombie et al. 2017), contrary to the expectation that sharing habitat with fox  
290 sparrows might reduce food or nest site availability during breeding.

291 Intraspecific competition for winter food and space are well-known to affect juvenile  
292 survival and population growth in song sparrows (Nice 1943; Arcese 1989; Arcese et al. 1992;  
293 Wilson and Arcese 2008), raising the possibility that interspecific competition with fox sparrows  
294 may also reduce survival in juvenile song sparrows sufficient to cause population decline.  
295 Specifically, Dhondt (2012) notes that competitive exclusion becomes more likely when, in the  
296 presence of intraspecific competition for a limiting resource, the addition of an interspecific  
297 competitor further reduces the fitness of subordinate competitors by further reducing access to  
298 those resources. Consistent with these expectations, we observed a strong overlap in preference  
299 for native seeds in fox and song sparrows, mirroring the results of Willson (1971) who reported  
300 strong overlap in preference for commercial seed in Illinois, USA, and also found fox sparrows  
301 to be significantly more efficient at handling seeds on average. Moreover, on Mandarte Is., fox  
302 sparrows excluded song sparrows from access to supplemental food in 91 and 100% of contests  
303 in October and March, respectively. Because these periods correspond with annual peaks in  
304 intraspecific aggression and dispersal in song sparrow (Arcese 1989; Wilson and Arcese 2008),  
305 these findings suggest that fox sparrows limit song sparrow abundance on Mandate Is. via  
306 aggressive competition for winter food. Overall, therefore, our findings are consistent with the  
307 hypothesis that range shifts in colonizing species have the potential to drive community  
308 composition via interspecific competition.

309           The coexistence of interspecific competitors has been shown to depend in part on the  
310 ability of species to partition resources in ways that allow each to maintain positive growth rates.  
311 In ground finches (*Geospiza* spp) on the Galapagos Islands, a drought-mediated decline in seed  
312 abundance intensified competition between a resident and colonist species, but also facilitated  
313 their rapid morphological divergence and coexistence (Grant and Grant 2006). Stuart et al.  
314 (2014) also reported the rapid evolution of feeding behavior and morphology in a native lizard  
315 following the invasion of its habitat by a competitively dominant congener. Similarly, Jankowski  
316 et al. (2010) demonstrated a strong role for interspecific competition in maintaining elevational  
317 range boundaries in congeneric Andean forest birds, but noted that as ranges shift upwards, the  
318 species at the top may be limited in their response. These studies illustrate a potential for  
319 ‘evolutionary rescue’ to facilitate co-existence via rapid adaptation (e.g., Carlson et al. 2014),  
320 and imply that song and fox sparrows are most like to co-exist where sufficient heterogeneity in  
321 habitat type or resource use allows each species to diverge sufficiently in its use of limiting  
322 resources to maintain positive growth rates.

323           In contrast, low habitat heterogeneity on Mandarte Is. (Lameris et al. 2016; Crombie et al.  
324 2017), small population size and low juvenile survival rates in song sparrows all increase the  
325 likelihood of their local extirpation on Mandarte Is. (Arcese et al. 1992; Arcese and Marr 2006).  
326 Although divergence in quantitative traits potentially affecting co-existence is possible (Schluter  
327 and Smith 1986), small population size, random genetic drift and gene swamping are likely to  
328 limit rapid local adaptation in the Mandarte Is. song sparrow population (Keller et al. 2001; Marr  
329 et al. 2002). Given regional increases in fox sparrow abundance (Vistry et al. 2017) and declines  
330 in song sparrow abundance (Jewell and Arcese 2008; National Audubon Society 2010; Sauer et

331 al. 2017), it remains an open question as to how competition between these species may be  
332 affecting abundance at larger spatial scales.

333         Alternative explanations for the decline of our focal song sparrow population seem  
334 unlikely. Jewell and Arcese (2008) showed that brown-headed cowbirds (*Molothrus ater*) can  
335 limit song sparrow population growth by reducing reproductive success, but cowbirds were  
336 absent from Mandarte Is. in 16 of 17 yrs since 2000, and female reproductive success increased  
337 over the course of our study. Severe weather can also decimate sparrow populations (Arcese et  
338 al. 1992; Keller et al. 1994; Smith et al. 2006) but has been ameliorated by climate warming (P.  
339 Arcese and R. Norris, unpubl. res). Despite changes in vegetation cover, we detected no  
340 reduction in the cover of fruiting shrubs (Lameris et al. 2016) or increases in nest failure  
341 (Crombie et al. 2017). Overall, therefore, our results strongly support the hypothesis that fox  
342 sparrows caused the Mandarte Is. song sparrow population to decline, but more work is needed  
343 to understand how fox sparrows may limit song sparrow abundance and distribution regionally.

344         Shifts in species distribution could have far-reaching effects on plant and animal  
345 communities via their effects on predation, pathogens and competition (e.g., Simberloff 2005;  
346 Parmesan 2006; Early and Sax 2014; Elmhagen et al. 2015; Rodewald and Arcese 2016).  
347 Although the threat of competitive exclusion by colonizing species is sometimes downplayed  
348 (Davis 2003; Gurevitch and Padilla 2004; Krosby et al. 2015), novel competitive interactions can  
349 be expected to increase as climate and habitat change promote shifts in species ranges further.  
350 Because interspecific competition can act subtly in communities (Dhondt 2012), long-term and  
351 experimental studies of the competitive exclusion of native species by colonists undergoing  
352 range expansion will be needed to predict community dynamics in the future. Our results  
353 indicate that in the absence of ecological or evolutionary shifts in niche dimension, range



354 expansions by dominant competitors have the potential to cause the extirpation of historically  
355 resident species when competitive interactions between them are strong and resources not  
356 equitably partitioned.

357

358

### **ACKNOWLEDGEMENTS**

359 We thank many people that have contributed to monitoring on Mandarte Is. and the Tsawout and  
360 Tseycum Bands who kindly provide us permission to work there. We are grateful to J.M. Reid,  
361 L. Keller, R. Schuster, M. Crombie, J. Krippel, N. Morrell, E. Hampshire and N. Chen for help  
362 with data, experimental design, analysis, or preparation of the manuscript. Our work was  
363 supported by the University of British Columbia, W. and H. Hesse, the American Ornithologists'  
364 Union, and Natural Sciences and Engineering Research Council of Canada.

365

## LITERATURE CITED

- 366 Arcese P (1989) Intrasexual competition, mating system and natal dispersal in song sparrows.  
367 *Anim Behav* 38:958–979. doi: 10.1016/S0003-3472(89)80137-X
- 368 Arcese P, Marr AB (2006) Population viability in the presence and absence of cowbirds,  
369 catastrophic mortality, and immigration. In: Smith JNM, Keller LF, Marr AB, Arcese P  
370 (eds) *Conservation and biology of small populations: the song sparrows of Mandarte Island*.  
371 Oxford University Press, New York, New York, USA, pp 175–191
- 372 Arcese P, Smith JNM (1985) Phenotypic correlates and ecological consequences of dominance  
373 in song sparrows. *J Anim Ecol* 54:817–830. doi: Article
- 374 Arcese P, Smith JNM (1988) Effects of population density and supplemental food on  
375 reproduction in song sparrows. *J Anim Ecol* 57:119–136.
- 376 Arcese P, Smith JNM, Hochachka WM, et al (1992) Stability, regulation, and the determination  
377 of abundance in an insular song sparrow population. *Ecology* 73:805–822. doi:  
378 10.2307/1940159
- 379 Arcese P, Sogge MK, Marr AB, Patten MA (2002) Song sparrow (*Melospiza melodia*). In: Poole  
380 A, Gill F (eds) *The birds of North America*, No. 704. The Birds of North America Inc.,  
381 Philadelphia, PA, USA,
- 382 Bennett JR, Dunwiddie PW, Giblin DE, Arcese P (2012) Native versus exotic community  
383 patterns across three scales: Roles of competition, environment and incomplete invasion.  
384 *Perspect Plant Ecol Evol Syst* 14:381–392. doi: 10.1016/j.ppees.2012.10.001
- 385 Carlson SM, Cunningham CJ, Westley PAH (2014) Evolutionary rescue in a changing world.

- 386 Trends Ecol Evol 29:521–530. doi: 10.1016/j.tree.2014.06.005
- 387 Caswell H (1996) Analysis of life table response experiments II. alternative parameterizations  
388 for size- and stage-structured models. Ecol Modell 88:73–82. doi: 10.1016/0304-  
389 3800(95)00070-4
- 390 Chesson P (2000) Mechanisms of maintenance of species diversity. Annu Rev Ecol Syst 31:343–  
391 366. doi: 10.1146/annurev.ecolsys.31.1.343
- 392 Crombie MD, Germain RR, Arcese P (2017) Nest-site preference and reproductive performance  
393 of Song Sparrows (*Melospiza melodia*) in historically extant and colonist shrub species.  
394 Can J Zool 95:115–121. doi: 10.1139/cjz-2016-0189
- 395 Davies KE, Chesson P, Harrison S, et al (2005) Spatial heterogeneity explains the scale  
396 dependence of the native-exotic diversity relationship. Ecology 86:1602–1610.
- 397 Davis MA (2003) Biotic globalization: does competition from introduced species threaten  
398 biodiversity? Bioscience 53:481. doi: 10.1641/0006-  
399 3568(2003)053[0481:BGDCFI]2.0.CO;2
- 400 Davis MB, Shaw RG (2001) Range shifts and adaptive responses to quaternary climate change.  
401 Science 292:673–679.
- 402 de Kroon H, Plaisier A, Groenendaal J Van, Caswell H (1986) Elasticity: the relative  
403 contribution of demographic parameters to population growth rate. Ecology 67:1427–1431.
- 404 Dhondt AA (2012) Interspecific competition in birds. Oxford University Press, New York, New  
405 York, USA
- 406 Doherty TS, Glen AS, Nimmo DG, et al (2016) Invasive predators and global biodiversity loss.

- 407 Proc Natl Acad Sci U S A 113:11261–11265. doi: 10.1073/pnas.1602480113
- 408 Drent PJ, van Tets GF, Tompa FS, Vermeer K (1964) The breeding birds of Mandarte Island,  
409 British Columbia. *Can Field-Naturalist* 78:208–263.
- 410 Early R, Sax DF (2014) Climatic niche shifts between species' native and naturalized ranges  
411 raise concern for ecological forecasts during invasions and climate change. *Glob Ecol*  
412 *Biogeogr* 23:1356–1365. doi: 10.1111/geb.12208
- 413 Elmhagen B, Eriksson O, Lindborg R (2015) Implications of climate and land-use change for  
414 landscape processes, biodiversity, ecosystem services, and governance. *Ambio* 44 Suppl  
415 1:S1–5. doi: 10.1007/s13280-014-0596-6
- 416 ESRI (2011) ArcGIS Desktop: Release 10.
- 417 Germain RR, Arcese P (2014) Distinguishing individual quality from habitat preference and  
418 quality in a territorial passerine. *Ecology* 95:436–445. doi: 10.1890/13-0467.1
- 419 Germain RR, Schuster R, Delmore KE, Arcese P (2015) Habitat preference facilitates successful  
420 early breeding in an open-cup nesting songbird. *Funct Ecol* 29:1522–1532. doi:  
421 10.1111/1365-2435.12461
- 422 Grant PR, Grant BR (2006) Evolution of character displacement in Darwin's finches. *Science*  
423 313:224–226. doi: 10.1002/9780470114735.hawley00624
- 424 Gurevitch J, Padilla DK (2004) Are invasive species a major cause of extinctions? *Trends Ecol*  
425 *Evol* 19:470–474. doi: 10.1016/j.tree.2004.07.005
- 426 Hothorn T, Bretz F, Westfall P (2008) Simultaneous inference in general parametric models.  
427 *Biometrical J* 50:346–363.

- 428 Jankowski JE, Robinson SK, Levey DJ (2010) Squeezed at the top: interspecific aggression may  
429 constrain elevational ranges in tropical birds. *Ecology* 91:1877–1884.
- 430 Jewell KJ, Arcese P (2008) Consequences of parasite invasion and land use on the spatial  
431 dynamics of host populations. *J Appl Ecol* 45:1180–1188. doi: 10.1111/j.1365-  
432 2664.2008.01503.x
- 433 Keller LF, Arcese P, Smith JNM, et al (1994) Selection against inbred song sparrows during a  
434 natural population bottleneck. *Nature* 372:356–357.
- 435 Keller LF, Jeffery KJ, Arcese P, et al (2001) Immigration and the ephemerality of a natural  
436 population bottleneck: evidence from molecular markers. *Proc Royal Soc Biol* 268:1387-  
437 1394.
- 438 Kramer CY (1956) Extension of multiple range tests to group means with unequal number of  
439 replications. *Biometrics* 12:307–310.
- 440 Krosby M, Wilsey CB, McGuire JL, et al (2015) Climate-induced range overlap among closely  
441 related species. *Nat Clim Chang* 5:883–886. doi: 10.1038/NCLIMATE2699
- 442 Lameris TK, Bennett JR, Blight LK, et al (2016) A century of ecosystem change: human and  
443 seabird impacts on plant species extirpation and invasion on islands. *PeerJ* 4:e2208. doi:  
444 10.7717/peerj.2208
- 445 Loarie SR, Carter BE, Hayhoe K, et al (2008) Climate change and the future of California’s  
446 endemic flora. *PLoS One* 3:e2502. doi: 10.1371/journal.pone.0002502
- 447 MacDougall AS, Gilbert B, Levine JM (2009) Plant invasions and the niche. *J Ecol* 97:609–615.  
448 doi: 10.1111/j.1365-2745.2009.01514.x

- 449 Marr AB, Keller LF, Arcese P (2002) Heterosis and outbreeding depression in descendants of  
450 natural immigrants to an inbred population of song sparrows (*melospiza melodia*).  
451 *Evolution* 56:131–142. doi: 10.1111/j.0014-3820.2002.tb00855.x
- 452 Melbourne BA, Cornell H V., Davies KF, et al (2007) Invasion in a heterogeneous world:  
453 resistance, coexistence or hostile takeover? *Ecol Lett* 10:77–94. doi: 10.1111/j.1461-  
454 0248.2006.00987.x
- 455 National Audubon Society (2010) The Christmas bird count historical results [Online].  
456 <http://www.christmasbirdcount.org>. Accessed 16 Jun 2015
- 457 Nice MM (1943) Studies in the life history of the song sparrow. II. The behavior of the song  
458 sparrow and other passerines. New York
- 459 Parmesan C (2006) Ecological and evolutionary responses to recent climate change. *Annu Rev*  
460 *Ecol Syst* 37:637–669.
- 461 R Core Team (2015) R: A language and environment for statistical computing.
- 462 Reaser JK, Meyerson LA, Cronk Q, et al (2007) Ecological and socioeconomic impacts of  
463 invasive alien species in island ecosystems. *Environ Conserv* 34:98. doi:  
464 10.1017/S0376892907003815
- 465 Rodewald AD, Arcese P (2016) Direct and Indirect Interactions between Landscape Structure  
466 and Invasive or Overabundant Species. *Curr Landsc Ecol Reports* 1:30–39. doi:  
467 10.1007/s40823-016-0004-y
- 468 Sauer JR, Niven DK, Hines JE, et al (2017) The North American Breeding Bird Survey, Results  
469 and Analysis 1966 - 2015. Version 2.07.2017 USGS Patuxent Wildlife Research Center,

- 470 Laurel, MD.
- 471 Sax DF, Stachowicz JJ, Brown JH, et al (2007) Ecological and evolutionary insights from  
472 species invasions. *Trends Ecol Evol* 22:465–471. doi: 10.1016/j.tree.2007.06.009
- 473 Schluter D, Smith JNM (1986) Natural Selection on Beak and Body Size in the Song Sparrow.  
474 *Evolution* 40:221. doi: 10.2307/2408803
- 475 Shea K, Chesson P (2002) Community ecology theory as a framework for biological invasions.  
476 *Trends Ecol Evol* 17:170–176.
- 477 Simberloff D (2005) Non-native species DO threaten the natural environment! *J Agric Environ*  
478 *Ethics* 18:595–607. doi: 10.1007/s10806-005-2851-0
- 479 Smith JNM, Marr AB, Arcese P, Hochachka WM (2006) Fluctuations in numbers: population  
480 regulation and catastrophic mortality. In: Smith JNM, Keller LF, Marr AB, Arcese P (eds)  
481 *Conservation and biology of small populations: the song sparrows of Mandarte Island*.  
482 Oxford University Press, New York, New York, USA, pp 43–64
- 483 Sorte CJB, Williams SL, Carlton JT (2010) Marine range shifts and species introductions:  
484 comparative spread rates and community impacts. *Glob Ecol Biogeogr* 19:303–316. doi:  
485 10.1111/j.1466-8238.2009.00519.x
- 486 Stuart YE, Campbell TS, Hohenlohe PA, et al (2014) Rapid evolution of a native species  
487 following invasion by a congener. *Science* 346:463–466. doi: 10.1126/science.1257008
- 488 Stubben C, Milligan B (2007) Estimating and analyzing demographic models using the popbio  
489 package in R. *J Stat Softw* 22:1–23.
- 490 Tompa FS (1963) Factors determining the numbers of song sparrows on Mandarte Island, B.C.

491 University of British Columbia

492 Tukey J (1949) Comparing individual means in the analysis of variance. *Biometrics* 5:99–114.

493 Visty H, Wilson S, Germain RR, et al (2017) Demography of sooty fox sparrows (*Passerella*  
494 *iliaca unalaschcensis*) following a shift from a migratory to resident life history. *Can J Zool.*

495 In Press.

496 Weckstein JD, Kroodsma DE, Faucett RC (2002) Fox sparrow (*Passerella iliaca*). In: Poole A

497 (ed) *The birds of North America online*. Cornell Lab of Ornithology, Ithaca, New York,

498 USA.

499 Willson MF (1971) Seed selection in some North American finches. *Condor* 73:415–429.

500 Wilson AG, Arcese P (2008) Influential factors for natal dispersal in an avian island

501 metapopulation. *J Avian Biol* 39:341–347. doi: 10.1111/j.0908-8857.2008.04239.x

502 Wilson S, Norris DR, Wilson AG, Arcese P (2007) Breeding experience and population density

503 affect the ability of a songbird to respond to future climate variation. *Proc R Soc B-*

504 *Biological Sci* 274:2539–2545. doi: 10.1098/rspb.2007.0643

505



506 **Figure Legends**

507 FIGURE 1. Number of breeding female song sparrows in 45 years from 1960–63 and 1975–2016  
508 (black circles) and fox sparrow breeding females in 13 years from 1960–2016 (grey diamonds).  
509 Song sparrow population size has declined significantly over the study period while fox sparrow  
510 population size has increased. Shaded areas represent predicted values  $\pm$  1 SE.

511  
512 FIGURE 2: Percent of yearling male and female song sparrows surviving from the end of  
513 parental care (day 24 after hatching) to April 30th of the following year (juvenile survival) from  
514 1975-2016 (excluding 1979 and 1980 when juvenile survival was unknown).

515  
516 FIGURE 3. Contributions of (a) juvenile survival, (b) adult reproductive rate and (c) adult  
517 survival to song sparrow population growth from 1975–2014, derived from a stage-structured  
518 life table response experiment (see Methods). The contribution of juvenile survival changed  
519 significantly over time, but reproductive rate and adult survival remained approximately zero,  
520 indicating that the observed decline in song sparrows is best explained by the decrease in  
521 juvenile survival (Figure 3). The shaded areas around the line indicate predicted values  $\pm$  1 SE.

522  
523 FIGURE 4. Juvenile song sparrow survival declined as the number of fox sparrow breeding  
524 females increased. The shaded areas around the line indicate predicted values  $\pm$  1 SE. The black  
525 circles are observed juvenile song sparrow survival in each study year for which fox sparrow  
526 population size was known ( $N_{\text{yrs}} = 11$ ).

527

528 FIGURE 5. Proportion of time song (dark) and fox (light) sparrows fed on each seed type during  
529 feeder visits (see Methods). Seeds were presented by type in identical circular depressions in  
530 plywood feeders dispersed across Mandarte Island. Fox and song sparrow seed preference  
531 overlapped completely. Whiskers represent approximate 95% confidence intervals around the  
532 median (solid line), and the box spans the lower and upper quartiles (25%–75%).

533

534 FIGURE 6. Closest approach by territorial male and female song sparrows to taxidermic mounts  
535 presented at the center of song sparrow territories during playback trials. Song sparrows (SOSP)  
536 came closer to the conspecific mount than to the fox sparrow (FOSP) or control (Swainson's  
537 thrush) mounts, and there was no difference in song sparrow response to the fox sparrow and  
538 control mounts, indicating that song sparrows do not respond to simulated territorial intrusions  
539 by fox sparrows. Whiskers represent approximate 95% confidence intervals around the median  
540 (solid line), and the box spans the lower and upper quartiles (25%–75%).

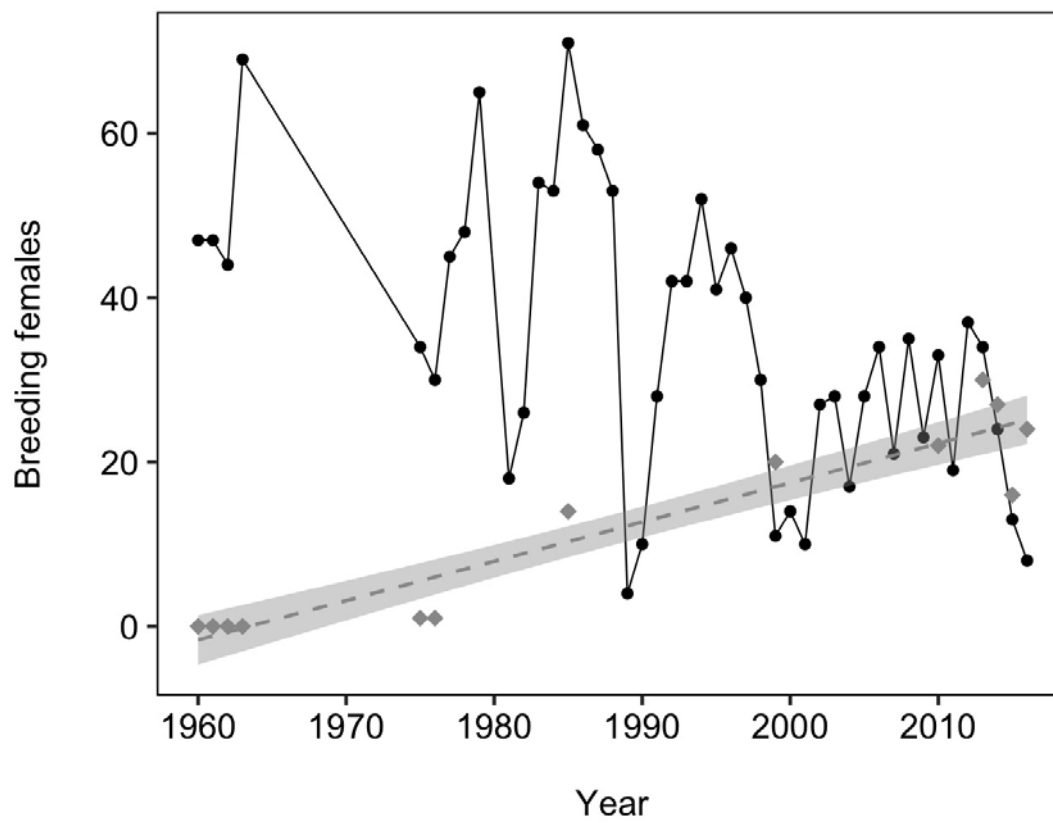

541

542 FIGURE 1

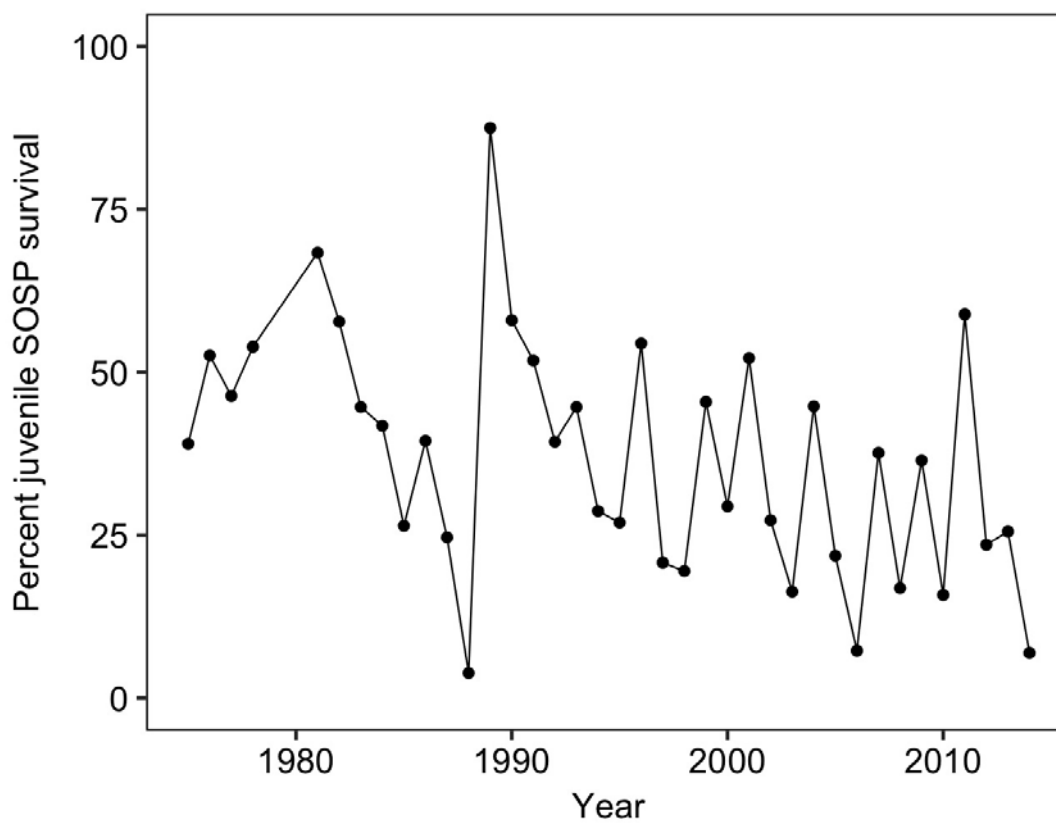

543

544 FIGURE 2

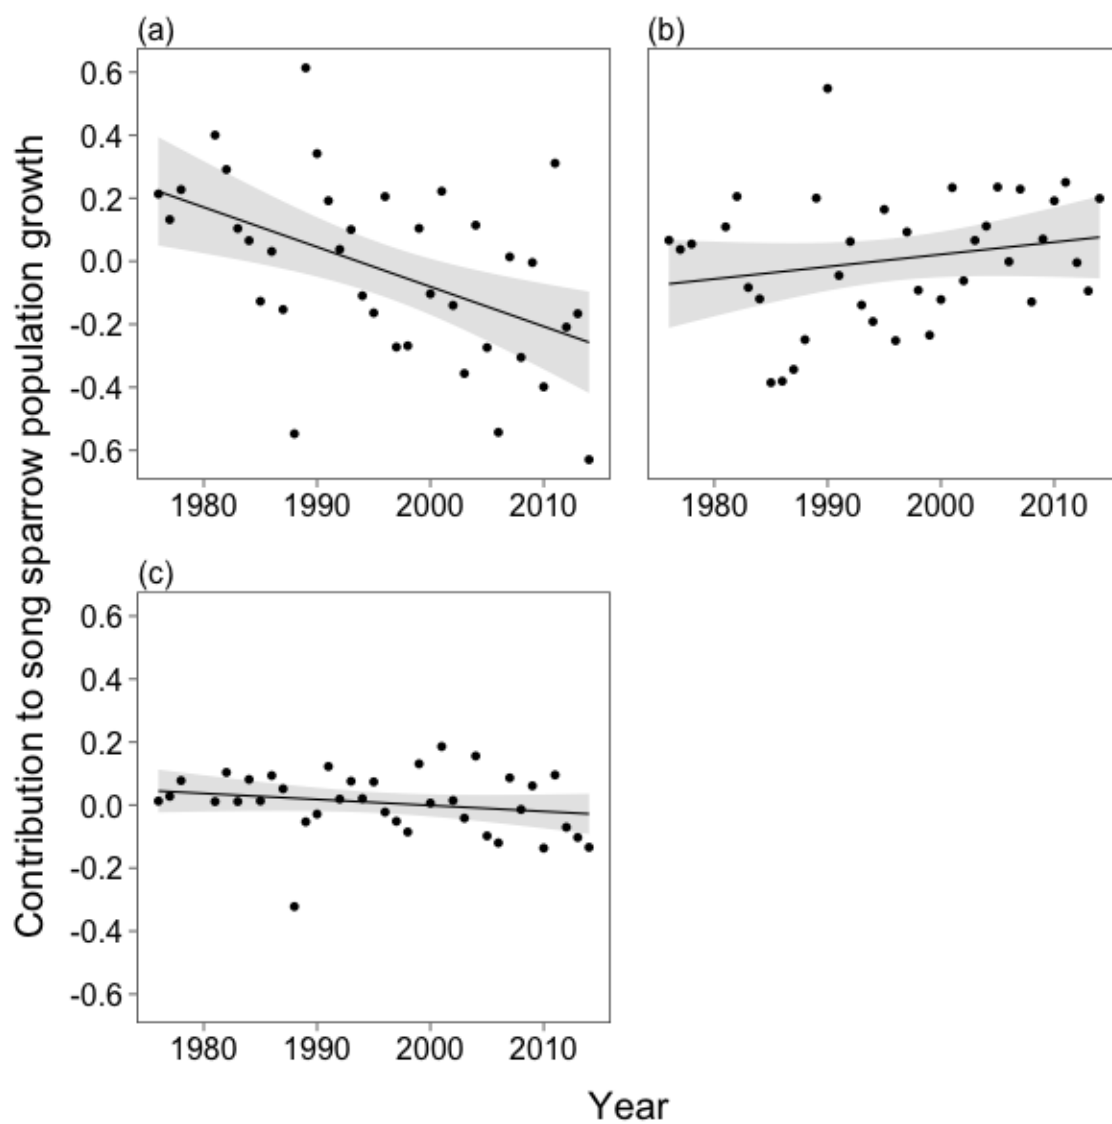

545

546 FIGURE 3

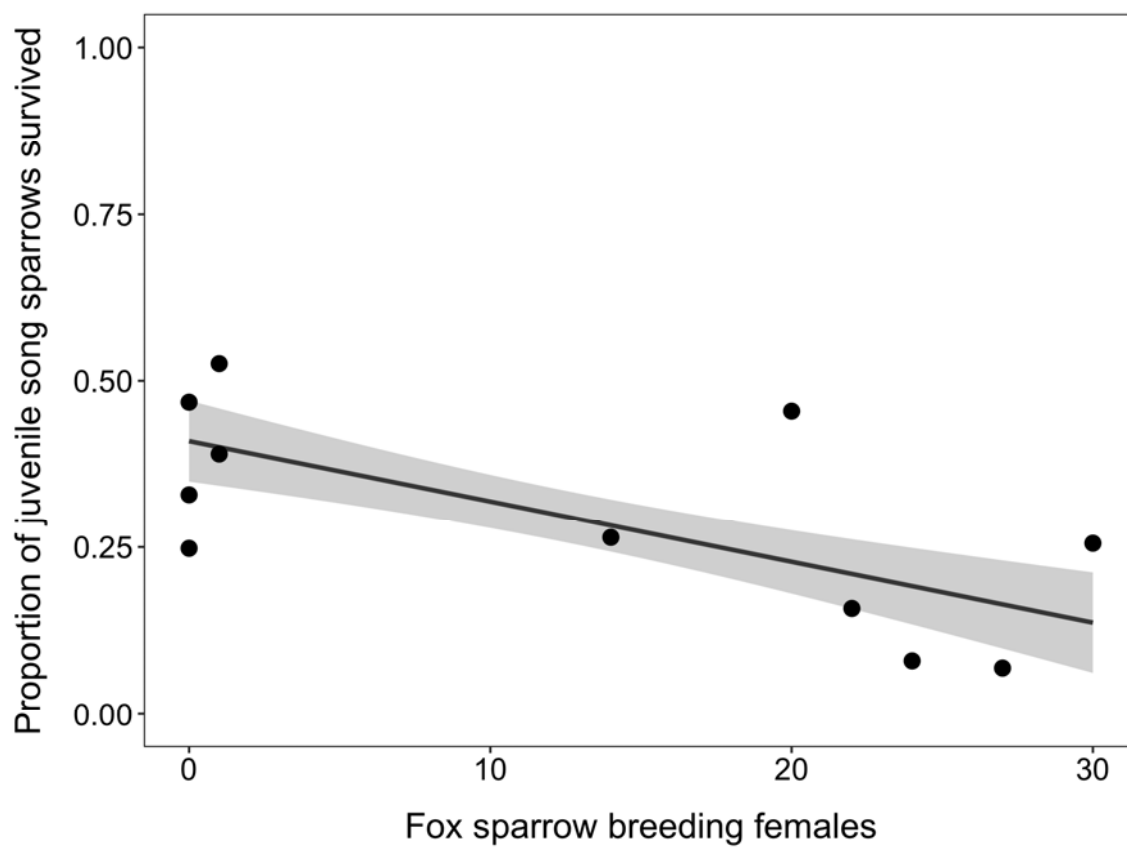

547

548 FIGURE 4

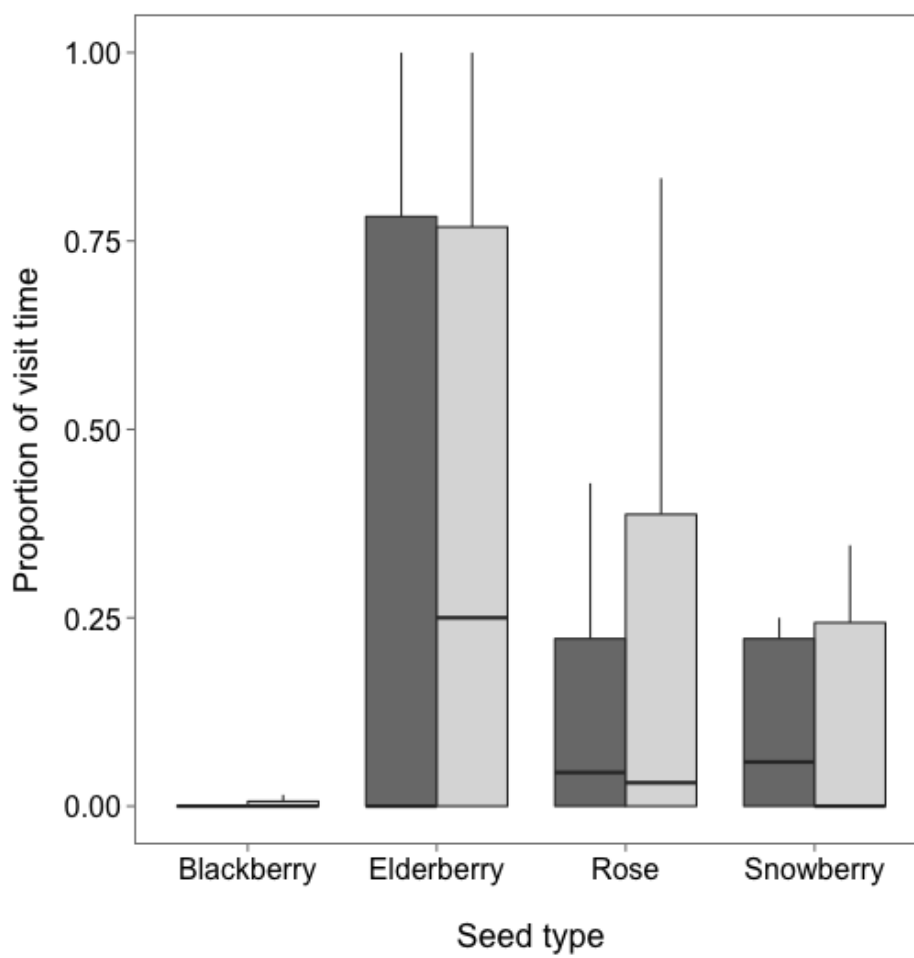

FIGURE 5

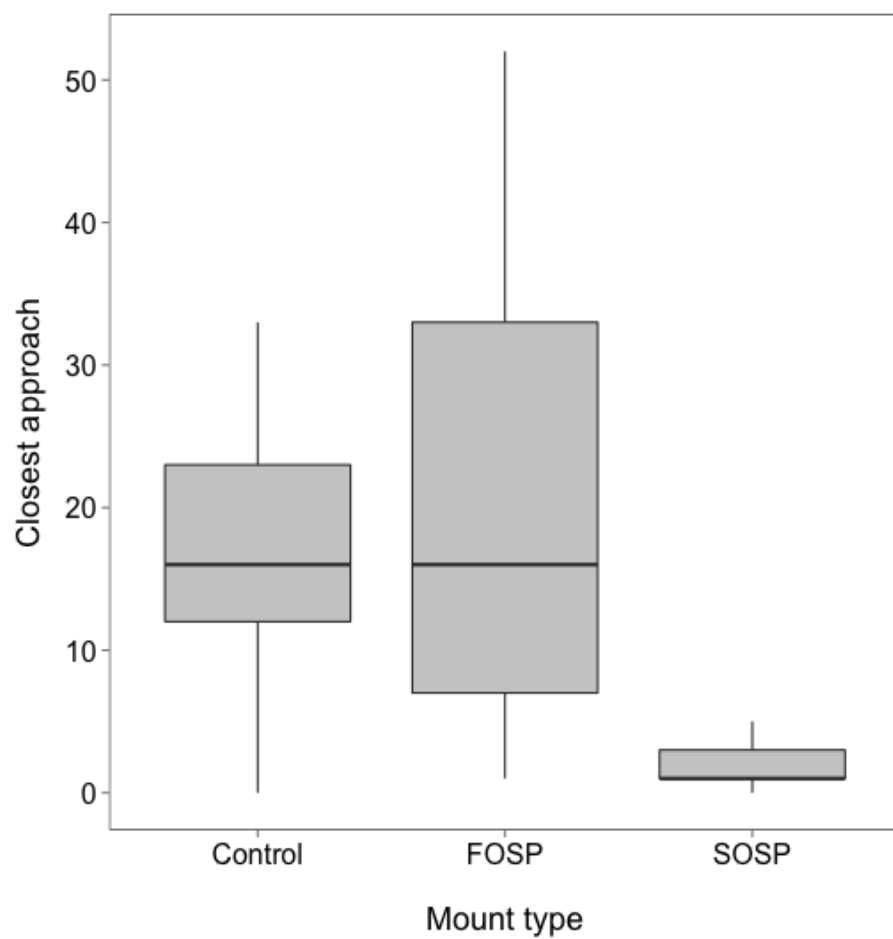

FIGURE 6
